# Supplementary material for: RASEL: An ensemble model for selection of core SNPs and its application for identification and classification of cattle breeds
Source: Research Square preprint supplement (doi:10.21203/rs.3.rs-6048799/v1), 2025-03-11
Supplement: Supplementary file 1 [file 9d3147c2a057cad8e7c0c5c0.docx]

**Supplementary Table 1:** Chromosome wise 657 Ancestry Informative Markers found in reference breeds

| **BTA** | **AIM** | **BTA** | **AIM** |
| --- | --- | --- | --- |
| 5 | 51 | 12 | 20 |
| 8 | 38 | 16 | 20 |
| 2 | 35 | 9 | 18 |
| 3 | 34 | 14 | 18 |
| 10 | 34 | 18 | 18 |
| 21 | 34 | 22 | 17 |
| 1 | 31 | 15 | 15 |
| 11 | 31 | 29 | 13 |
| 4 | 30 | 17 | 12 |
| 13 | 27 | 25 | 10 |
| 6 | 26 | 28 | 10 |
| 20 | 25 | 23 | 9 |
| 24 | 24 | 26 | 8 |
| 19 | 22 | 27 | 7 |
| 7 | 20 |  |  |

**Supplementary table 2:** Chromosome wise 207 Breed Informative Markers

| **BTA** | **BIM** | **BTA** | **BIM** |
| --- | --- | --- | --- |
| 8 | 19 | 18 | 7 |
| 5 | 18 | 22 | 7 |
| 2 | 13 | 13 | 6 |
| 1 | 11 | 16 | 5 |
| 3 | 10 | 19 | 5 |
| 11 | 10 | 20 | 5 |
| 21 | 10 | 24 | 5 |
| 12 | 9 | 29 | 5 |
| 4 | 8 | 26 | 4 |
| 10 | 8 | 17 | 3 |
| 6 | 7 | 23 | 3 |
| 7 | 7 | 27 | 3 |
| 14 | 7 | 9 | 2 |
| 15 | 7 | 28 | 2 |
|  |  | 25 | 1 |
